# Supplementary material
Source: PubMed Central journal article supplement (PMC5339764)
Supplement: 10.1074_M116.766469_jbc.M116.766469-1.pdf [file 10.1074_M116.766469_jbc.M116.766469-1.pdf]

| Sample                                         |                        |       | Source                                 | SS   | df | MS   | F     | P              |
|------------------------------------------------|------------------------|-------|----------------------------------------|------|----|------|-------|----------------|
| <i>GDU1-myc</i>                                | <i>GDU1-myc log2-2</i> | Total | adjusted means                         | 0.34 | 1  | 0.34 | 12.09 | <b>0.00106</b> |
| n                                              | n                      |       | adjusted error                         | 1.39 | 50 | 0.03 |       |                |
| 26                                             | 27                     | 53    | adjusted total                         | 1.72 | 51 |      |       |                |
| Observed Means                                 |                        |       | <b>Homogeneity Between Regressions</b> |      |    |      |       |                |
| 1.5812                                         | 1.7281                 | 1.656 | Source                                 | SS   | df | MS   | F     | P              |
| Adjusted Means                                 |                        |       | between regressions                    | 0.12 | 1  | 0.12 | 4.52  | <b>0.039</b>   |
| 1.5749                                         | 1.7342                 | 1.656 | remainder                              | 1.27 | 49 | 0.03 |       |                |
| Aggregate Correlation within Samples: CV vs DV |                        |       | adjusted error                         | 1.39 | 50 |      |       |                |
| $r = -0.83$                                    | $r^2 = 0.68$           |       |                                        |      |    |      |       |                |

**Supplemental Table 1: One-Way Analysis of Covariance (ANCOVA) for linear regressions of *GDU1-myc* signal as a function of time in the *GDU1-myc* and *GDU1-myc log2-2* backgrounds (plotted in Fig. 4. 1G).** The p-value in the upper right indicates that the two linear regressions in Fig. 4. 1G—representing the degradation of *GDU1-myc* in wild-type and *log2-2* backgrounds—are statistically significantly different. The validity of this conclusion depends on the assumption of homogeneity between the two regressions. The p-value in the lower right indicates this assumption is satisfied.
